# Supplementary material for: Airborne measurements of the spatial distribution of aerosol chemical composition across Europe and evolution of the organic fraction
Source: Copernicus journal article supplement (doi:10.5194/acp-10-4065-2010), 2010-04-29
Supplement: Supplementary file 1 [file acp-10-4065-2010-supplement.pdf]

1 Airborne measurements of the spatial distribution  
2 of aerosol chemical composition across Europe  
3 and evolution of the organic fraction:  
4 Supplementary material

5 W. T. Morgan<sup>1</sup>, J. D. Allan<sup>1,2</sup>, K. N. Bower<sup>1</sup>, E.J. Highwood<sup>3</sup>,  
D. Liu<sup>1</sup>, G. R. McMeeking<sup>1</sup>, M. J. Northway<sup>3</sup>, P. I. Williams<sup>1,2</sup>,  
R. Krejci<sup>4</sup> and H. Coe<sup>1</sup>

6 1. *Centre for Atmospheric Science, University of Manchester, Manchester, UK*

7 2. *National Centre for Atmospheric Science, University of Manchester, UK*

8 3. *Department of Meteorology, University of Reading, UK*

9 4. *Department of Applied Environmental Science, Atmospheric Science Unit, Stock-*  
10 *holm University, Sweden*

11 **1 Scope**

12 The supplementary material outlined in this document is provided in order to present  
13 the meteorological context of the flight operations and support the analysis techniques  
14 and data quantification steps outlined in the main paper. The meteorological fields  
15 corresponding to each flying period are presented and further information regarding  
16 the photochemical context of the operations is presented. Further details regarding  
17 the volume closure between the Aerosol Mass Spectrometer (AMS) and the Passive  
18 Cavity Aerosol Spectrometer Probe (PCASP) are discussed. Comparison of the esti-  
19 mated HOA with primary combustion tracers is included. The relationship between  
20 the fractional contribution of Low-Volatility Oxygenated Organic Aerosol (LV-OOA)  
21 to the organic mass and the normalised organic signal at  $m/z$  44 is also shown. Further  
22 information is provided regarding the Positive Matrix Factorisation (PMF) analysis ex-  
23 amples from the main text, as well as a summary of some PMF diagnostics for the  
24 whole dataset. The PMF analysis was performed using the tools presented by Ulbrich  
25 et al. (2009).

## 26 **2 Meteorological summary**

27 Figs. S1 and S2 display the typical meteorological conditions prevalent during each  
28 period considered by the analysis. The periods are relatively consistent in terms of  
29 their transport patterns, with the air masses transporting pollution from continental  
30 Europe downwind to either the UK region or into the Eastern Atlantic Ocean. Thus the  
31 flights are predominantly focused upon either sampling such pollution over continental  
32 Europe itself or at a range of scales downwind.

33 The evolution of the aerosol chemical composition during the LONGREX-2 period  
34 was examined based upon the relatively consistent transport patterns prevalent during  
35 the period. Fig. S3a displays the back trajectories for each flight during this period  
36 based upon Straight and Level Runs (SLRs) during each flight. The trajectories display  
37 highly consistent behaviour during the period, which is unsurprising given the relative  
38 stability of the high pressure system located over Northern Europe during this period.  
39 Fig. S3b highlights the back trajectory from the 14 May 2008, which was initialised  
40 from a SLR during B374 in the Eastern Atlantic Ocean. B374 represented the end-  
41 point in our operations during this period both in terms of the geographical location  
42 of the missions and also the distance from continental European sources i.e. the most  
43 aged polluted air mass. The back trajectory indicates that the spatial coverage of the  
44 flight operations closely matches the air mass transport during the period leading up to  
45 the 14 May 2008. Specifically, flights B370-B374 took place across Northern Europe  
46 during this period covering close to 5 days of air mass transport.

## 47 **3 AMS versus PCASP comparison**

48 Validation of the collection efficiency treatment applied to the dataset following the  
49 principles developed by Matthew et al. (2008) is accomplished by comparing the AMS  
50 data with the volume estimated concentrations from the PCASP instrument. The AMS  
51 total mass concentrations were converted to total volume concentrations using the den-  
52 sities reported by Cross et al. (2007), which correspond to  $1.27 \text{ g cm}^{-3}$  for organics  
53 and  $1.77 \text{ g cm}^{-3}$  for inorganics. A comparison of the estimated volume from the AMS  
54 and PCASP is shown for SLRs below 3000 m in Fig. S4. Over all of the considered  
55 flights, the estimated AMS volume concentrations were 26% higher than the estimated  
56 PCASP volumes. This average agreement is predominantly determined by the LON-  
57 GREX flights, which were quite consistent in terms of the agreement from flight-to-  
58 flight. The ADIENT flying periods sit on either side of the overall regression slope,  
59 with the ADIENT-2 flying indicating that the PCASP volume was 48% of the AMS  
60 volume. These discrepancies are considered tolerable given the large uncertainties pre-  
61 viously reported in the literature for PCASP volume estimates (e.g. Moore et al., 2004;  
62 Hallar et al., 2006) and the uncertainties in the AMS volume estimates.

63 For B357, the PCASP volume estimate was more than two times greater than the  
64 AMS volume estimate, which is outside of the bounds of uncertainty for the two instru-  
65 ments. The reason for this discrepancy is unknown but could reflect an artifact in either  
66 instrument or the presence of material that is not detected by the AMS. The discrep-  
67 ancy between the two instruments is also reflected in the calculated volume-scattering

68 relationship when comparing the measurements with a nephelometer system. The main  
69 difference between B357 and the other flights in the dataset is the sampling altitude of  
70 the aircraft, where in B357, the aircraft operated at a constant altitude of 200 m for  
71 the majority of the flight. The other flights in the dataset operated at altitudes higher  
72 in the boundary layer. Potentially, the nephelometer and PCASP measurements could  
73 be perturbed by the constant low-level flying in a humid environment as the aerosol  
74 sampled may not be sufficiently dried in the inlet lines and by the heater respectively.  
75 The AMS volume estimates do not include water, so this could potentially cause the  
76 discrepancy. Additionally, the PCASP and nephelometer may be measuring refractory  
77 material or particles above the cut off of the AMS aerodynamic lens. This would also  
78 lead to the AMS underestimating the volume relative to the PCASP.

## 79 **4 Photochemical context**

80 The relationship between  $O_3$  and CO with the  $O_3:NO_x$  ratio discussed in the main pa-  
81 per is presented in Fig. S5. The results indicate that  $O_3$  increases and CO decreases  
82 steadily in the 1-100  $O_3:NO_x$  range, which is a reflection of photochemistry and di-  
83 lution respectively. Beyond an  $O_3:NO_x$  ratio of 100, the concentrations decrease with  
84 CO returning to background levels and  $O_3$  remaining relatively constant in the 40-60  
85 ppb range.

## 86 **5 Positive Matrix Factorisation**

87 Potentially, the most challenging and subjective aspect of PMF analysis is the selec-  
88 tion of the appropriate number of factors. For AMS datasets, this is usually accom-  
89 plished using internal PMF diagnostics, similarity to reference mass spectra and exter-  
90 nal measurement parameters. An example of an internal diagnostic is the parameter  
91  $Q/Q_{\text{expected}}$ , which is defined as the total sum of the scaled residuals, divided by its  
92 expected value. This expected value is derived based upon the error estimates for the  
93 data matrix (Ulbrich et al., 2009). A value of unity for the  $Q/Q_{\text{expected}}$  parameter in-  
94 dicates that the expected variance associated with random errors can be explained by  
95 the solution set. Values greater than unity indicate that there is additional variance not  
96 accounted for by the solution set. The suite of aerosol and gas phase instrumentation  
97 available on the aircraft provides several necessary external parameters to facilitate  
98 validation of the solution. Reference spectra utilised in this study are taken from the  
99 AMS spectral database (<http://cires.colorado.edu/jimenez-group/AMSsd/>)  
100 described in Ulbrich et al. (2009). The factor solutions are interpreted based upon com-  
101 parisons with external parameters and reference mass spectra. Comparisons between  
102 mass spectra are accomplished using the Uncentered Correlation (UC, Ulbrich et al.,  
103 2009) coefficient, while the comparisons with external parameters use the Pearson's  $R$   
104 coefficient.

105 Here we include additional information regarding the PMF solutions used in the  
106 main manuscript. This includes example PMF solutions from a range of flights in  
107 different conditions, a summary of the results for the whole dataset and further details

108 regarding the estimation of HOA from our data.

## 109 **5.1 Example PMF solutions**

110 Several PMF solutions will be illustrated in the following section based upon some  
111 example flights from the dataset. The flights chosen are B357 (16 April 2008), B362  
112 (6 May 2008), B369 (10 May 2008) and B406 (25 September 2008) as these broadly  
113 represent the range of operations conducted in terms of their proximity to pollution  
114 sources. B357 was conducted primarily downwind of the major conurbations of Manch-  
115 ester and Liverpool, in the North-West of England. B362 was conducted on a South-  
116 North transect originating from Oberpfaffenhofen in southern Germany, culminating  
117 in a sequence of Straight-and-Level Runs (SLRs) in the North Sea in the outflow from  
118 continental Europe. B406 was conducted in the outflow from continental Europe along  
119 the southern coast of the UK. B369 was conducted in the Baltic Sea region and reflects  
120 background conditions for comparison with the more polluted examples.

121 The results for B357 are shown in Fig. S6, for B362 in Fig. S7, for B369 in Fig. S8  
122 and B406 in Fig. S9. All the examples show excellent agreement between the measured  
123 and reconstructed organic mass concentrations.

### 124 **5.1.1 Close to source case study – B357**

125 For B357, a 2-factor solution was deemed most appropriate as increasing the number  
126 of factors led to a phenomenon known as “splitting”. This leads to multiple factors  
127 being assigned with numerically similar factor profiles and time series. In this case,  
128 the additional factors merely represented variability within the factors identified in the  
129 2-factor solution. Consequently, the 2-factor solution was retained for analysis. The  
130  $Q/Q_{\text{expected}}$  was equal to 1.38. Reconstructed OM concentrations made up 98% of  
131 the measured OM concentrations. Factor 1 (OOA-1) exhibits a correlation coefficient  
132 of 0.89 and 0.98 when compared to reference spectra for an ambient rural case (from  
133 Canada) and laboratory generated fulvic acid respectively, which has chemical func-  
134 tionality that are representative of aged OM (e.g. McFiggans et al., 2005) and hence  
135 is indicative of an LV-OOA type factor. Factor 2 (OOA-2) is interpreted as HOA as  
136 it exhibits a high correlation (0.91) with the derived HOA mass spectrum from Pitts-  
137 burgh (Zhang et al., 2005a). Additionally, it has a correlation coefficient of 0.87 when  
138 compared to diesel exhaust from a chase study in New York (Canagaratna et al., 2004).  
139 The factor 2 time series correlates with  $\text{NO}_x$  ( $r=0.65$ ), CO ( $r=0.73$ ) and BC ( $r=0.79$ ),  
140 with the strong gradients in the time series coincident with large increases in  $\text{NO}_x$ , CO  
141 and BC. Cororally, factor 1 exhibits low correlation ( $r<0.35$ ) with these combustion  
142 tracers. Comparison of the emission ratio of POA to  $\text{NO}_x$  from B357, which is equal  
143 to  $29.9 \mu\text{g sm}^{-3} \text{ppm}^{-1}$ , with the previous studies summarised in Table S1 yields good  
144 agreement. Furthermore, the emission ratio relative to CO of  $8.0 \mu\text{g sm}^{-3} \text{ppm}^{-1}$  falls  
145 within the literature values summarised in Table S1. Therefore, it appears that factor 2  
146 in this case is likely attributable to primary sources of OM in the form of HOA.

### 147 5.1.2 Continental European scale case studies – B362 and B406

148 While B357 presented a relatively straight forward 2-factor solution, B362 and B406  
149 present highly complex examples of the factor analysis. When more than 3 factors were  
150 examined, the “splitting” phenomenon was observed. The 3-factor solutions contained  
151 a factor profile strongly resembling LV-OOA, with  $m/z$  44 dominating the mass spec-  
152 trum and a high correlation with the reference spectra for fulvic acid and the ambient  
153 rural case. The second factor is characterised by a mass spectrum with similar intensi-  
154 ties at  $m/z$  43 and 44 and an enhanced base peak at  $m/z$  55. Such a spectrum is fairly  
155 typical of a SV-OOA type component (Ulbrich et al., 2009; Jimenez et al., 2009). The  
156 remaining factor appeared to represent a second SV-OOA mass spectrum but with en-  
157 hanced mass peaks associated with commonly resolved hydrocarbon peaks ( $m/z$ 's 27,  
158 29, 41, 43, 55, 57, 69, 71, ...), indicating a contribution of HOA. This third factor was  
159 correlated with  $\text{NO}_x$ , CO and BC but for B362 the slope was found to be approximately  
160 a factor of 2 greater than the range of literature values cited in Table S1. A regression  
161 for the same factor from B406 with  $\text{NO}_x$  and BC also yielded a similar discrepancy  
162 although a CO measurement was not available during the flight so a comparison with  
163 CO was not possible. Enhanced signal is not identified at  $m/z$  60 or 73 during either  
164 flight. These are typical mass spectral markers for wood burning emissions (Alfarra  
165 et al., 2007), therefore solid fuel burning is not considered to be a potential source of  
166 the enhanced mass. Consequently, it appears that the 3-factor solution is “blending”  
167 more than one distinct organic component into a single factor. This is likely a conse-  
168 quence of there being more chemical variability in the SV-OOA component (arising  
169 from evaporation/condensation, aging etc.) than in the HOA component. Thus the  
170 PMF solution identifies a factor which represents a ‘mathematical mixing’ of the more  
171 recently formed OOA with a HOA component. This arises due to the commonality  
172 between some of the major peaks in their respective mass spectra e.g.  $m/z$  29 and 43.

173 The number of factors was increased under the supposition that an increase beyond  
174 3-factors would reveal a more realistic contribution of HOA to the OM by separating  
175 it from the more volatile, fresher OOA fraction. While OOA factor profiles gener-  
176 ally display significant variability as a result of differing processes such as aging and  
177 partitioning, HOA factor profiles are far more chemically distinct. Additionally, the  
178 largely linear association between HOA concentrations and urban primary emission  
179 markers makes source identification more straightforward than for OOA. Based upon  
180 these criteria, the number of factors was increased and inspected at each step until a  
181 single factor was present that most resembled HOA. For B362, this occurred for a 6-  
182 factor solution while for B406, a 7-factor solution was chosen. These factors were  
183 chosen due to their strong resemblance to HOA based upon their mass spectra and  
184 comparisons with combustion tracers. The comparison with the combustion tracers  
185 for B362 is shown in Fig. S14b, which indicates that increasing the number of factors  
186 does appear to bring the HOA-type component closer to the literature emission ratio.  
187 The main deviation from the relationship is from a low-level SLR in a highly moist  
188 layer ( $\text{RH} > 95\%$ ) where total mass concentrations exceeded  $50 \mu\text{gsm}^{-3}$  and ammo-  
189 nium nitrate was the dominant chemical component. The layer is likely characteristic  
190 of freshly formed secondary material and it appears that some of the freshest-OOA  
191 mass has been apportioned to the HOA profile. The number of factors was increased

192 to 15 but this did not significantly alter the mass apportionment during this event.

## 193 **5.2 Bootstrapping analysis**

194 The numerical stability of the factor solutions was quantitatively evaluated using a  
195 bootstrapping analysis (Ulbrich et al., 2009, and references therein), where random  
196 resampling of the data matrix is performed in the time dimension. This analysis was  
197 performed using 20 iterations, with the results being grouped according to the UC  
198 coefficient between mass spectral profiles. The results of this analysis are summarised  
199 in Fig. S14a for B362 by comparing the contribution to total mass versus  $m/z$  44 for  
200 each factor as the solutions are stepped through an increasing number of factors. The  
201 derived mean and standard deviations from the bootstrapping analysis are compared  
202 with the base solutions. The analysis indicates that by increasing the number of factors,  
203 the solutions become increasingly unstable in a numerical sense. This is a consequence  
204 of the aforementioned chemical variability inherent in the air masses sampled during  
205 the flight operations, which results in large scope for different factor solutions for larger  
206 numbers of factors. The bootstrapping analysis suggests that the 2-factor solution is the  
207 most appropriate solution, especially as the OOA-1 component is highly robust with a  
208 close match between the base solution and the bootstrapping solution. The enhanced  
209 standard deviation in the  $m/z$  44 for the OOA-2 component is likely a consequence  
210 of the variability in the chemical nature of the OM. Very similar results were derived  
211 for B406, with the 2-factor solution being more numerically robust than subsequent  
212 solutions.

213 Further results from the bootstrapping analysis are shown for B357 in Fig. S13, for  
214 B362 in Fig. S14, for B369 in Fig. S15 and for B406 in Fig. S16. The bootstrapping  
215 results for all the flights are summarised in Table S2. The variance of the solutions in  
216 both the time series and factor profile dimensions is evaluated using suitable metrics.  
217 The time series diagnostic is the mean of the standard deviation for each factor, reported  
218 as a percentage of the overall mean mass concentration. For the mass spectra, the  
219 greatest standard deviation for each factor profile from the bootstrapping analysis is  
220 reported. A mean is not deemed appropriate to evaluate the stability of the mass spectra  
221 as the chemical assignment of factors is performed based on a limited number of peaks  
222 (i.e. less than 10).

223 The OOA-1 (LV-OOA) factor profiles are highly robust with little deviation be-  
224 tween the average mass spectrum from the bootstrapping analysis and the base solu-  
225 tion. Furthermore, the standard deviations are typically low. This is a consistent result  
226 throughout the dataset, which is shown by the low scores for the diagnostics in Table  
227 S2. The OOA-2 factor profiles are more variable for B362, B369 and B406, with less  
228 stability in the signal intensity at  $m/z$  44. This reflects the continuum nature of the OM  
229 discussed in the main text, whereby there is significant variability on a given flight in  
230 the level of oxidation. Thus by randomly resampling the dataset in the time dimension  
231 using the bootstrapping procedure, conditions with either enhanced or diminished  $m/z$   
232 44 in the OOA-2 may be encountered and this is reflected by enhanced standard devi-  
233 ations in both the time series and mass spectra. The normalised standard deviation for  
234 the time series of OOA-2 for B369 is much greater than the other flights in the dataset.  
235 This is predominantly a result of the low concentrations encountered during the flight,

236 coupled with large standard deviations which are associated with large changes in the  
237 composition of the OOA-2 component in this instance. For much of the flight, signal  
238 at  $m/z$  57 is close to zero indicating that HOA makes a minimal contribution to the  
239 OOA-2 component. However, during the peak OM event at 15:47 UTC, signal at  $m/z$   
240 57 is enhanced and thus the contribution of HOA is likely elevated. This event co-  
241 incides with the maximum in the  $\text{NO}_x$  concentration and is associated with potential  
242 sampling of low-level urban outflow from Stockholm into the Baltic Sea. During this  
243 period, the standard deviations for the OOA-2 factor increase. Thus such changes in  
244 the OOA-2 composition from SV-OOA dominated to HOA dominated are reflected by  
245 large increases in the standard deviation values from the bootstrapping analysis. The  
246 much lower normalised standard deviation values associated with the time series of  
247 the OOA-2 components for the rest of the dataset suggest this feature to be atypical.  
248 This is a reflection of the regional nature of the measurements, with few instances of  
249 prolonged exposure to intense urban signatures.

250 The results presented here demonstrate the robustness of the chosen 2-factor solu-  
251 tions in terms of both the mass spectra and time series of the components. The OOA-1  
252 (LV-OOA) components are highly numerically stable, while the decreased numerical  
253 stability of the OOA-2 (SV-OOA and HOA) components is entirely consistent with the  
254 continuum of oxidation/aging discussed in the main text.

### 255 **5.3 Application to the entire dataset**

256 The remaining flights in the dataset were analysed in an identical manner to the frame-  
257 work established in the previous section. This resulted in broadly similar behaviour in  
258 terms of the inability to accurately and quantitatively resolve HOA. A consistent theme  
259 was that increasing the number of factors in order to attempt to separate the HOA con-  
260 tribution led to a numerically unstable solution. Thus we chose to use the 2-factor  
261 solutions as these consistently represented a more quantitative solution set.

262 A summary of the  $Q/Q_{\text{expected}}$  parameter is shown in Fig. S12, which indicates that  
263 the parameter is generally less than 2. Four flights had  $Q/Q_{\text{expected}}$  values greater than  
264 2, with the largest value being 5.01 (B374). Such values are greater than is generally  
265 considered optimal if attempting to produce a perfect characterisation of the dataset but  
266 given the difficulty in deriving robust results when more than 2 factors are chosen, it  
267 is not possible to reduce  $Q$  further. Consequently, the additional  $Q$  contribution prevalent  
268 in the dataset is considered as ‘model error’.

269 The available solutions include some rotational ambiguity, which is explored by  
270 varying a parameter known as “fPeak” (Ulbrich et al., 2009, and references therein).  
271 An fPeak range from from  $-2.5$  to  $2.5$  is investigated in order to explore the numerical  
272 variability in factor profiles and time series for small changes in  $Q/Q_{\text{expected}}$ . Invest-  
273 igation of the rotational freedom in the solutions using fPeak was accomplished by  
274 inspecting the mass spectra and time series in relation to external tracers for a subset of  
275 fPeak values from  $-2.5$  to  $2.5$ . The most appropriate value was then chosen, which for  
276 this dataset was determined to be zero in all cases. A test of the numerical uniqueness  
277 of the solution sets is the dependence upon the initiation seed, which is described by  
278 Ulbrich et al. (2009). Each of the 2-factor solutions was examined using this technique  
279 and little variation was exhibited for a range of different seeds.

### 280 **5.3.1 Estimation of HOA and comparison with OOA components**

281 Included in Fig. S11a are correlations of the estimated HOA concentration with Black  
282 Carbon (BC),  $\text{NO}_x$  and CO. These indicate that for 8 of the flights, the correlations  
283 of the estimated HOA with these primary emission tracers are greater than 0.5. Cor-  
284 relations lower than 0.5 are generally encountered on flights where these tracers and  
285 the estimated HOA are very low, thus the correlations break down at values when the  
286 relationships exhibit enhanced noise due to low signal. This is demonstrated in Fig.  
287 S11b and c, where at low concentrations the relationships are relatively flat but at en-  
288 hanced concentrations, the correlation is greater. Given the simple nature of the HOA  
289 estimate, these correlations and relationships do provide some confidence that the es-  
290 timated HOA provides a qualitative indicator of the contribution of HOA to the OM  
291 burden. The HOA estimate using this approach is likely an upper limit as the contribu-  
292 tion of any oxidised fragments at  $m/z$  57 has not been removed.

293 Also shown in Fig. S11a are the correlations between the Low-Volatility Oxidised  
294 Organic Aerosol (LV-OOA) organic mass fraction and the  $m/z$  44:OM ratio described  
295 in the main paper.



## 296 **References**

- 297 Alfarra, M. R., Prevot, A. S. H., Szidat, S., Sandradewi, J., Weimer, S., Lanz, V. A.,  
298 Schreiber, D., Mohr, M., and Baltensperger, U.: Identification of the mass spectral  
299 signature of organic aerosols from wood burning emissions, *Environmental Science*  
300 *& Technology*, 41, 5770–5777, 2007.
- 301 Allan, J. D., Williams, P. I., Morgan, W. T., Martin, C. L., Flynn, M. J., Lee, J., Nemitz,  
302 E., Phillips, G. J., Gallagher, M. W., and Coe, H.: Contributions from transport, solid  
303 fuel burning and cooking to primary organic aerosols in two UK cities, *Atmospheric*  
304 *Chemistry and Physics*, 10, 647–668, 2010.
- 305 Canagaratna, M. R., Jayne, J. T., Ghertner, D. A., Herndon, S., Shi, Q., Jimenez, J. L.,  
306 Silva, P. J., Williams, P., Lanni, T., Drewnick, F., Demerjian, K. L., Kolb, C. E., and  
307 Worsnop, D. R.: Chase studies of particulate emissions from in-use New York City  
308 vehicles, *Aerosol Science and Technology*, 38, 555–573, 2004.
- 309 Cross, E. S., Slowik, J. G., Davidovits, P., Allan, J. D., Worsnop, D. R., Jayne, J. T.,  
310 Lewis, D. K., Canagaratna, M., and Onasch, T. B.: Laboratory and Ambient Particle  
311 Density Determinations using Light Scattering in Conjunction with Aerosol Mass  
312 Spectrometry, *Aerosol Science and Technology*, 41, 343–359, URL <http://www.informaworld.com/10.1080/02786820701199736>, 2007.
- 314 de Gouw, J., Middlebrook, A., Warneke, C., Goldan, P., Kuster, W., Roberts, J., Fehsen-  
315 feld, F., Worsnop, D., Canagaratna, M., Pszenny, A., Keene, W., Marchewka, M.,  
316 Bertman, S., and Bates, T.: Budget of organic carbon in a polluted atmosphere:  
317 Results from the New England Air Quality Study in 2002, *Journal of Geophysical*  
318 *Research-Atmospheres*, 110, doi:10.1029/2004JD005623, 2005.
- 319 Hallar, A. G., Strawa, A. W., Schmid, B., Andrews, E., Ogren, J., Sheridan, P., Fer-  
320 rare, R., Covert, D., Elleman, R., Jonsson, H., Bokarius, K., and Luu, A.: Atmo-  
321 spheric Radiation Measurements Aerosol Intensive Operating Period: Comparison  
322 of aerosol scattering during coordinated flights, *J. Geophys. Res.*, 111, D05S09, doi:  
323 10.1029/2005JD006250, 2006.
- 324 Jimenez, J. L., Canagaratna, M. R., Donahue, N. M., Prevot, A. S. H., Zhang, Q., Kroll,  
325 J. H., DeCarlo, P. F., Allan, J. D., Coe, H., Ng, N. L., Aiken, A. C., Docherty, K. S.,  
326 Ulbrich, I. M., Grieshop, A. P., Robinson, A. L., Duplissy, J., Smith, J. D., Wilson,  
327 K. R., Lanz, V. A., Hueglin, C., Sun, Y. L., Tian, J., Laaksonen, A., Raatikainen, T.,  
328 Rautiainen, J., Vaattovaara, P., Ehn, M., Kulmala, M., Tomlinson, J. M., Collins,  
329 D. R., Cubison, M. J., E., Dunlea, J., Huffman, J. A., Onasch, T. B., Alfarra,  
330 M. R., Williams, P. I., Bower, K., Kondo, Y., Schneider, J., Drewnick, F., Borrmann,  
331 S., Weimer, S., Demerjian, K., Salcedo, D., Cottrell, L., Griffin, R., Takami, A.,  
332 Miyoshi, T., Hatakeyama, S., Shimono, A., Sun, J. Y., Zhang, Y. M., Dzepina,  
333 K., Kimmel, J. R., Sueper, D., Jayne, J. T., Herndon, S. C., Trimborn, A. M.,  
334 Williams, L. R., Wood, E. C., Middlebrook, A. M., Kolb, C. E., Baltensperger, U.,  
335 and Worsnop, D. R.: Evolution of Organic Aerosols in the Atmosphere, *Science*,  
336 326, 1525–1529, doi:10.1126/science.1180353, 2009.

- 337 Kirchstetter, T. W., Harley, R. A., Kreisberg, N. M., Stolzenburg, M. R., and Hering,  
338 S. V.: On-road measurement of fine particle and nitrogen oxide emissions from light-  
339 and heavy-duty motor vehicles, *Atmospheric Environment*, 33, 2955–2968, 1999.
- 340 Lanz, V. A., Alfarra, M. R., Baltensperger, U., Buchmann, B., Hueglin, C., and Pre-  
341 vot, A. S. H.: Source apportionment of submicron organic aerosols at an urban site  
342 by factor analytical modelling of aerosol mass spectra, *Atmospheric Chemistry and*  
343 *Physics*, 7, 1503–1522, 2007.
- 344 Matthew, B. M., Middlebrook, A. M., and Onasch, T. B.: Collection efficiencies in an  
345 Aerodyne Aerosol Mass Spectrometer as a function of particle phase for laboratory  
346 generated aerosols, *Aerosol Science and Technology*, 42, 884–898, 2008.
- 347 McFiggans, G., Alfarra, M. R., Allan, J., Bower, K., Coe, H., Cubison, M., Topping,  
348 D., Williams, P., Decesari, S., Facchini, C., and Fuzzi, S.: Simplification of the  
349 representation of the organic component of atmospheric particulates, *Faraday Dis-*  
350 *cussions*, 130, 341–362, 2005.
- 351 Moore, K. G., I., Clarke, A. D., Kapustin, V. N., McNaughton, C., Anderson, B. E.,  
352 Winstead, E. L., Weber, R., Ma, Y., Lee, Y. N., Talbot, R., Dibb, J., Anderson, T.,  
353 Doherty, S., Covert, D., and Rogers, D.: A comparison of similar aerosol measure-  
354 ments made on the NASA P3-B, DC-8, and NSF C-130 aircraft during TRACE-P  
355 and ACE-Asia, *J. Geophys. Res.*, 109, D15S15, doi:10.1029/2003JD003543, 2004.
- 356 Ulbrich, I. M., Canagaratna, M. R., Zhang, Q., Worsnop, D. R., and Jimenez, J. L.:  
357 Interpretation of organic components from Positive Matrix Factorization of aerosol  
358 mass spectrometric data, *Atmospheric Chemistry and Physics*, 9, 2891–2918, 2009.
- 359 Zhang, Q., Alfarra, M. R., Worsnop, D. R., Allan, J. D., Coe, H., Canagaratna, M. R.,  
360 and Jimenez, J. L.: Deconvolution and quantification of hydrocarbon-like and oxy-  
361 genated organic aerosols based on aerosol mass spectrometry, *Environmental Sci-*  
362 *ence & Technology*, 39, 4938–4952, doi:10.1029/2007GL029979, 2005a.
- 363 Zhang, Q., Worsnop, D. R., Canagaratna, M. R., and Jimenez, J. L.: Hydrocarbon-like  
364 and oxygenated organic aerosols in Pittsburgh: insights into sources and processes  
365 of organic aerosols, *Atmospheric Chemistry and Physics*, 5, 3289–3311, 2005b.

Table S1: Summary of POA:NO<sub>x</sub> and POA:CO emission ratios used in this study. Emission ratios are given in  $\mu\text{g sm}^{-3} \text{ppm}^{-1}$ .

| Study                      | Location            | POA:NO <sub>x</sub> | POA:CO |
|----------------------------|---------------------|---------------------|--------|
| Allan et al. (2010)        | London, UK          | 31.6                | N/A    |
| Allan et al. (2010)        | Manchester, UK      | N/A                 | 20.5   |
| de Gouw et al. (2005)      | Northeastern USA    | N/A                 | 9.4    |
| Kirchstetter et al. (1999) | Tunnel study, USA   | 11.0                | N/A    |
| Lanz et al. (2007)         | Zurich, Switzerland | 15.9                | 20.4   |
| Zhang et al. (2005b)       | Pittsburgh, USA     | N/A                 | 4.3    |

Table S2: Summary of the diagnostics relating to the bootstrapping analysis from the dataset for each flight.

| Flight | SD <sub>ts</sub> /TS (%) |       | Max (SD <sub>ms</sub> ) (%) |       |
|--------|--------------------------|-------|-----------------------------|-------|
|        | OOA-1                    | OOA-2 | OOA-1                       | OOA-2 |
| B357   | 2.0                      | 2.5   | 0.77                        | 0.85  |
| B362   | 5.6                      | 9.7   | 1.00                        | 2.44  |
| B365   | 2.8                      | 3.0   | 0.62                        | 1.31  |
| B366   | 13.4                     | 11.8  | 1.66                        | 1.46  |
| B369   | 19.1                     | 45.9  | 2.23                        | 1.66  |
| B370   | 2.9                      | 3.6   | 0.52                        | 0.46  |
| B371   | 4.8                      | 8.0   | 0.41                        | 1.82  |
| B373   | 2.3                      | 3.9   | 1.06                        | 0.86  |
| B374   | 1.1                      | 1.7   | 0.44                        | 0.68  |
| B379   | 6.6                      | 9.3   | 0.61                        | 1.63  |
| B380   | 1.4                      | 2.4   | 0.36                        | 0.37  |
| B401   | 11.1                     | 13.3  | 0.24                        | 0.32  |
| B402   | 5.5                      | 14.9  | 0.76                        | 1.23  |
| B406   | 1.4                      | 1.8   | 1.06                        | 0.79  |

Table S3: Summary statistics regarding the AMS chemical composition for each zone referred to the main paper. Concentrations are reported in  $\mu\text{g sm}^{-3}\text{t}$  at the 25<sup>th</sup>, 50<sup>th</sup> and 75<sup>th</sup> percentiles.

| Species  | Statistic        | Zones |      |      |      |      |      |      |
|----------|------------------|-------|------|------|------|------|------|------|
|          |                  | 1     | 2    | 3    | 4    | 5    | 6    | 7    |
| Organics | 25 <sup>th</sup> | 3.69  | 0.57 | 3.21 | 3.49 | 2.65 | 2.84 | 0.66 |
|          | 50 <sup>th</sup> | 4.13  | 0.91 | 3.69 | 4.13 | 3.63 | 3.68 | 1.40 |
|          | 75 <sup>th</sup> | 4.55  | 1.29 | 4.40 | 4.83 | 4.96 | 4.39 | 3.40 |
| Nitrate  | 25 <sup>th</sup> | 3.04  | 0.58 | 1.15 | 2.10 | 0.24 | 0.33 | 0.05 |
|          | 50 <sup>th</sup> | 3.51  | 2.11 | 2.92 | 4.84 | 1.24 | 1.00 | 0.14 |
|          | 75 <sup>th</sup> | 4.40  | 3.02 | 4.98 | 6.85 | 2.72 | 3.16 | 1.45 |
| Sulphate | 25 <sup>th</sup> | 2.78  | 0.83 | 2.88 | 1.99 | 0.98 | 1.13 | 0.49 |
|          | 50 <sup>th</sup> | 3.25  | 1.20 | 3.82 | 3.02 | 1.93 | 1.44 | 0.92 |
|          | 75 <sup>th</sup> | 3.65  | 1.78 | 4.89 | 3.65 | 4.12 | 1.93 | 2.12 |
| Ammonium | 25 <sup>th</sup> | 2.60  | 0.55 | 1.48 | 1.67 | 0.51 | 0.61 | 0.17 |
|          | 50 <sup>th</sup> | 2.87  | 1.14 | 2.06 | 2.25 | 1.11 | 1.23 | 0.45 |
|          | 75 <sup>th</sup> | 3.06  | 1.47 | 3.06 | 3.36 | 2.03 | 1.77 | 1.46 |

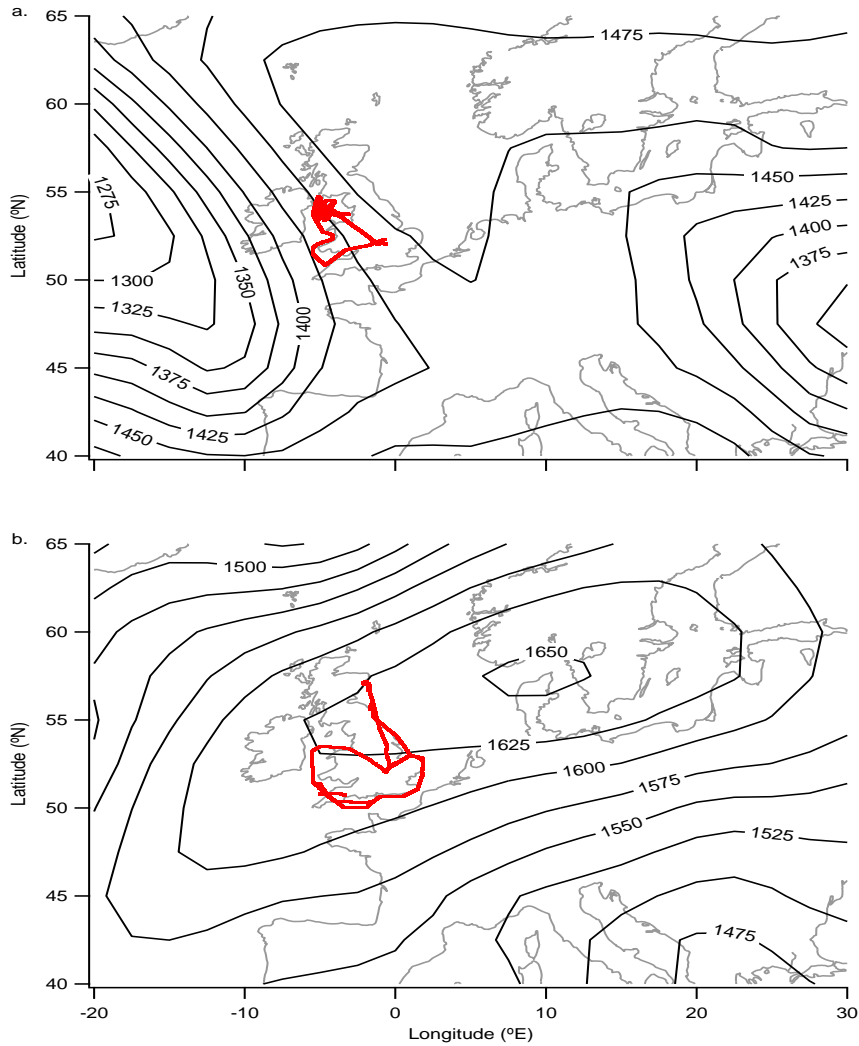

Figure S1: Flight tracks of the BAe-146 considered by this analysis for the ADIENT periods. Also shown are ECMWF 850 hPa geopotential height fields for each period considered by the analysis, where the field is either pertinent to a particular flight or is representative of the overall meteorological regime of the period. All geopotential height fields are for 12UTC. (a) summarises the flights for the UK-based ADIENT flying in April 2008 and the geopotential height field is from 16 April 2008 (B357). (b) summarises the flights for the UK-based ADIENT flying in September 2008 and the geopotential height field is from 25 September 2008 (B406).

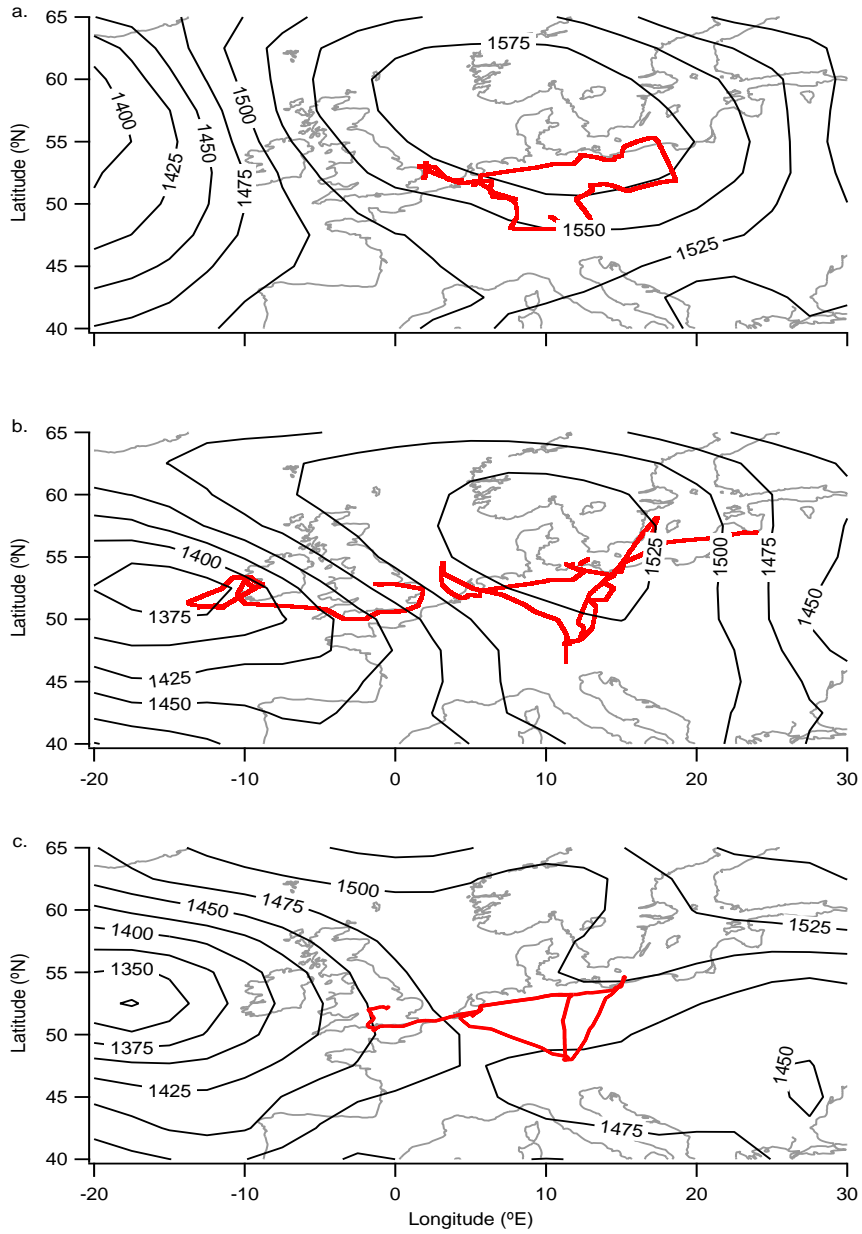

Figure S2: Same plots as Fig. S1 but now for the LONGREX flying period. (a) summarises the flights for the LONGREX-1 period with a geopotential height field for the 06 May 2008. (b) summarises the flights for the LONGREX-2 period with a geopotential height field for the 14 May 2008. (c) summarises the flights for the LONGREX-3 period with a geopotential height field for the 22 May 2008.

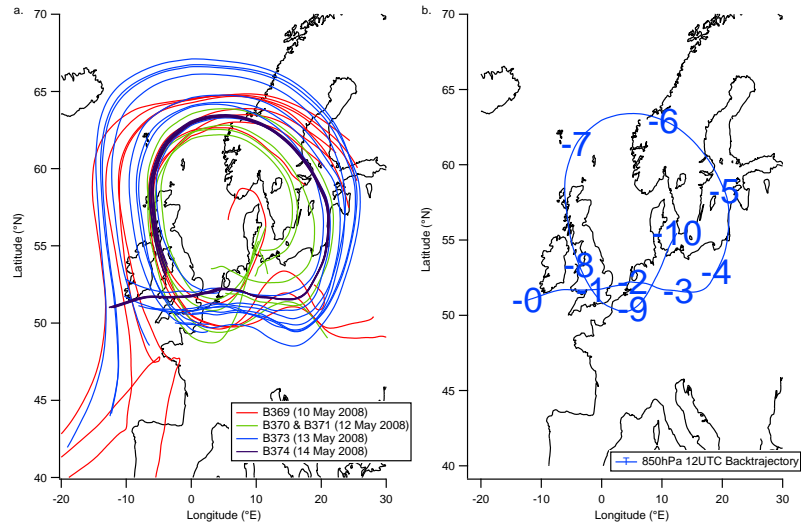

Figure S3: (a) Back trajectories at 850 hPa initialised from 1200 UTC on each flight day from the LONGREX-2 period. The initialisation points correspond to several SLRs during each flight. (b) Air mass back trajectory initialised from 1200 UTC on 14 May 2008 at 850 hPa. The numbered points relate to the number of days passed since the air mass was in that location.



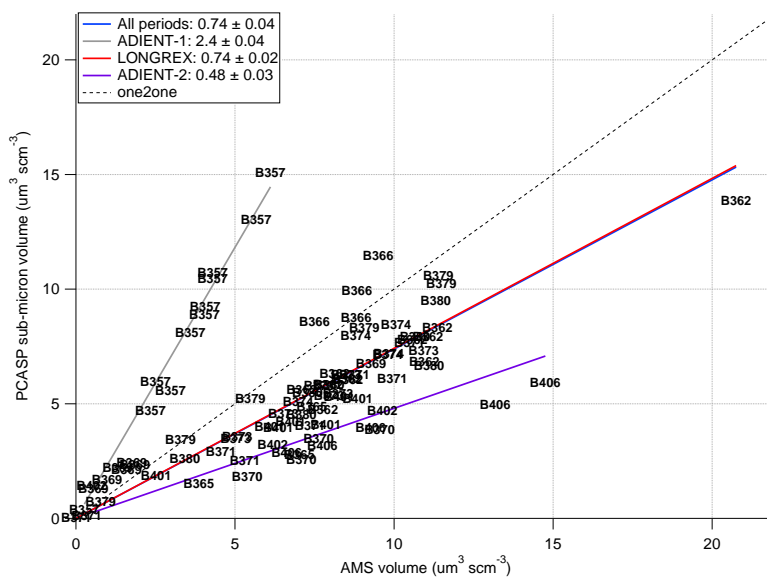

Figure S4: Comparison of inferred volume from the AMS with estimated sub-micron volume derived from the PCASP. The markers refer to SLRs below 3000 m i.e. within the boundary layer. The text markers refer to the flight which the point is from. Linear regression lines are shown for both individual flying periods and the study as a whole.

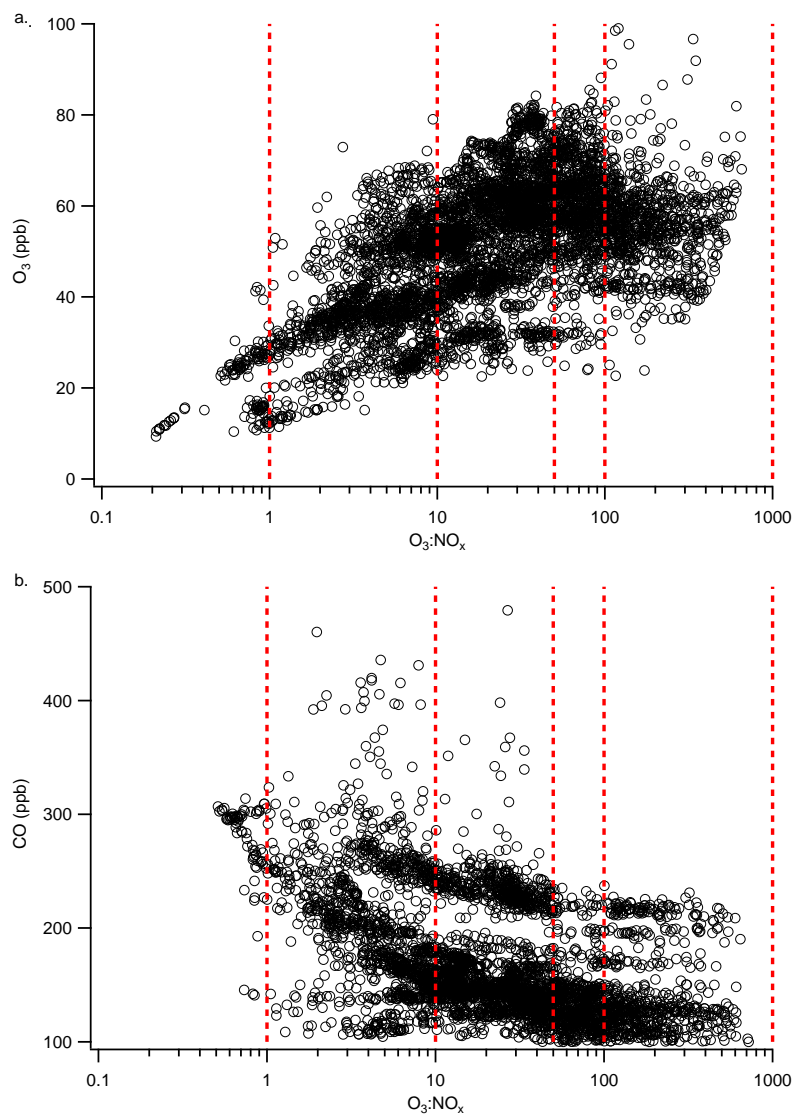

Figure S5: (a) Relationship between  $O_3$  and  $O_3:NO_x$  for all flights. (b) Relationship between CO and  $O_3:NO_x$  for all flights except for ADIENT-2. The red dashed lines refer to the distance from source boundaries discussed in the main paper.

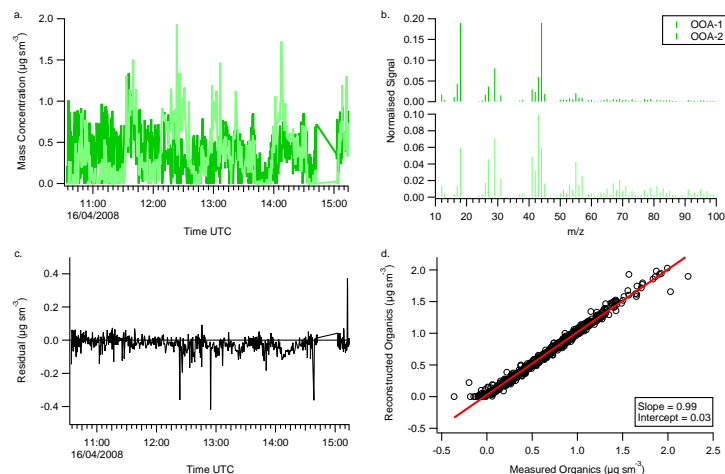

Figure S6: PMF solution for the two factor case from flight B357 including factor component time series (a) and mass spectra (b). The absolute residual is also shown in (c), whilst a comparison between the factor analysis reconstructed mass and measured organic signal is displayed in (d).

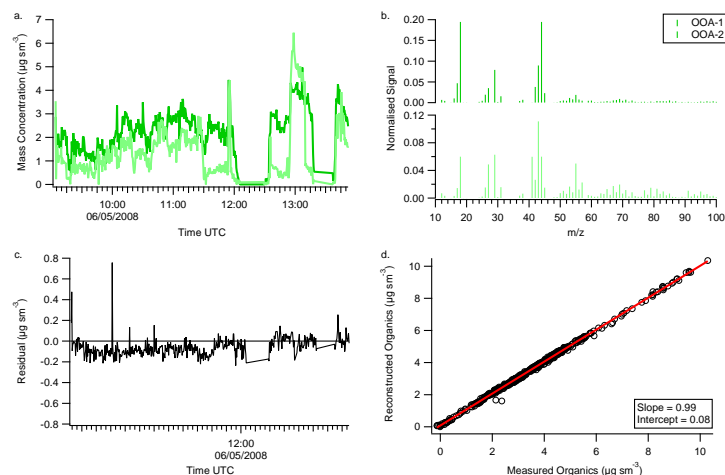

Figure S7: PMF solution for the two factor case from flight B362 including factor component time series (a) and mass spectra (b). The absolute residual is also shown in (c), whilst a comparison between the factor analysis reconstructed mass and measured organic signal is displayed in (d).

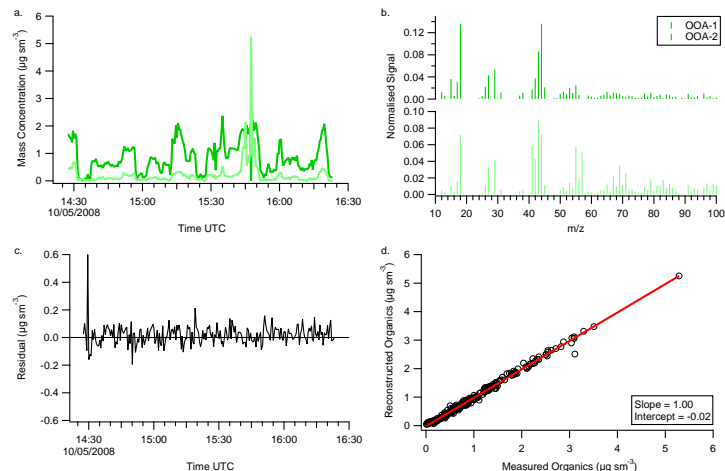

Figure S8: PMF solution for the two factor case from flight B369 including factor component time series (a) and mass spectra (b). The absolute residual is also shown in (c), whilst a comparison between the factor analysis reconstructed mass and measured organic signal is displayed in (d).

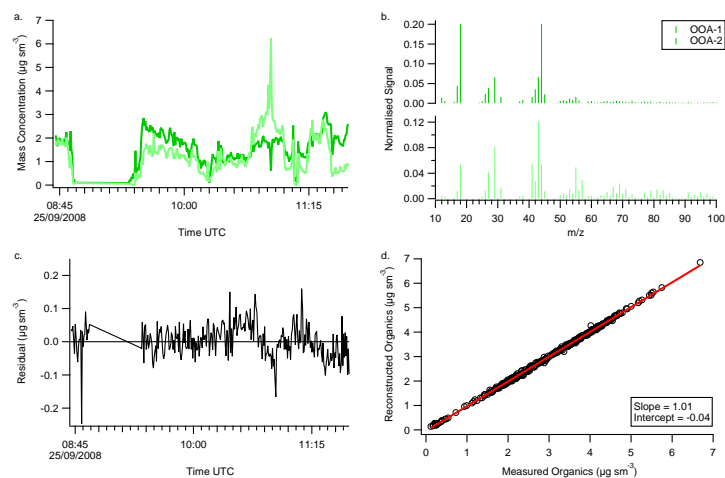

Figure S9: PMF solution for the two factor case from flight B406 including factor component time series (a) and mass spectra (b). The absolute residual is also shown in (c), whilst a comparison between the factor analysis reconstructed mass and measured organic signal is displayed in (d).

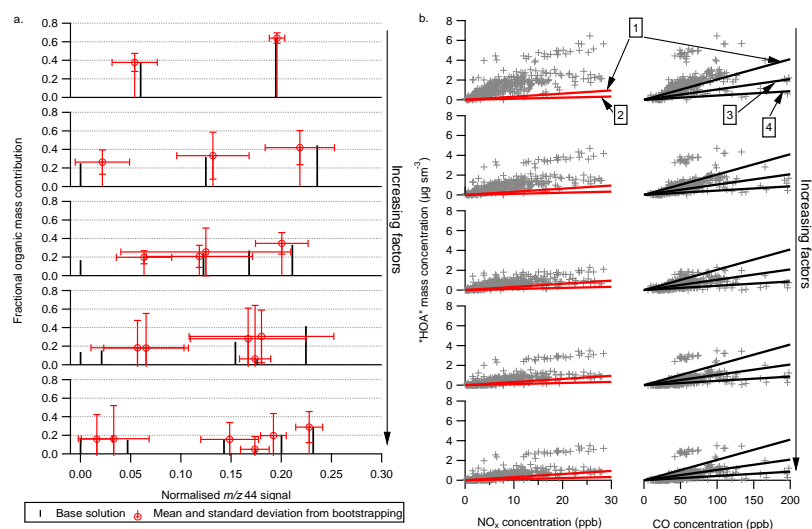

Figure S10: **(a)** Example from flight B362 of the relationship between the fractional mass contribution of a given factor to its normalised signal at  $m/z$  44 for PMF solutions from two through seven factors. The black vertical bars refer to the base solution, while the red vertical and horizontal bars are the results from a resampling analysis known as bootstrapping. Increased standard deviations and mismatching between the base and bootstrapping solutions suggest a numerical unstable solution. **(b)** Relationship between the most HOA like factor profile with  $NO_x$  (red line) and CO (black line) for the factor solutions in (a). Solid red and black lines refer to literature emission ratios where (1) is from Allan et al. (2010), (2) is from Kirchstetter et al. (1999), (3) is from Lanz et al. (2007) and (4) is from Zhang et al. (2005b).

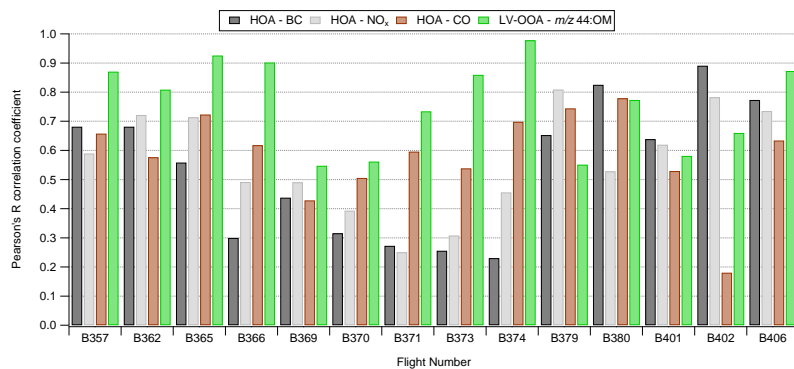

Figure S11: Summary of correlations for estimated HOA with Black Carbon (BC), NO<sub>x</sub> and CO. Also shown are the correlations for LV-OOA organic mass fractions with the normalised organic signal at m/z 44.

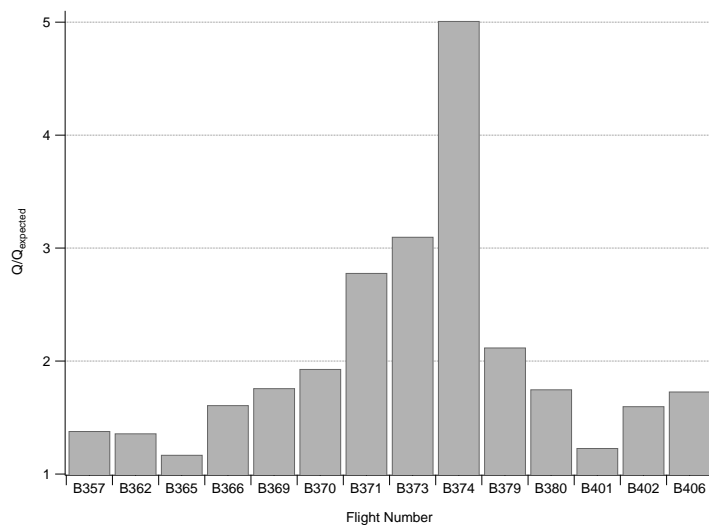

Figure S12: Summary of the  $Q/Q_{expected}$  parameter for each flight in the dataset. All values are for the two-factor solutions with an fPeak of zero.

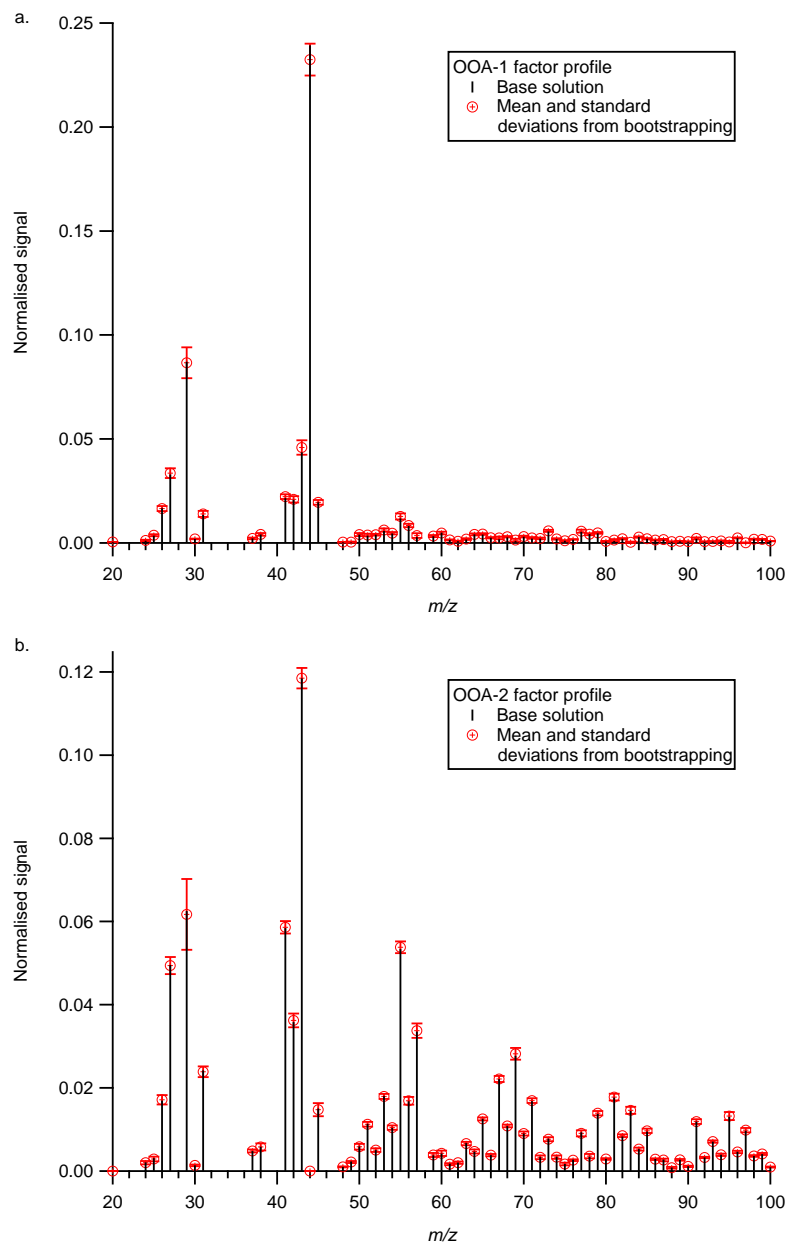

Figure S13: Results of the bootstrapping analysis for the two factor solution mass spectra for flight B357. (a) displays the mass spectrum for OOA-1, while (b) displays the mass spectrum for OOA-2.

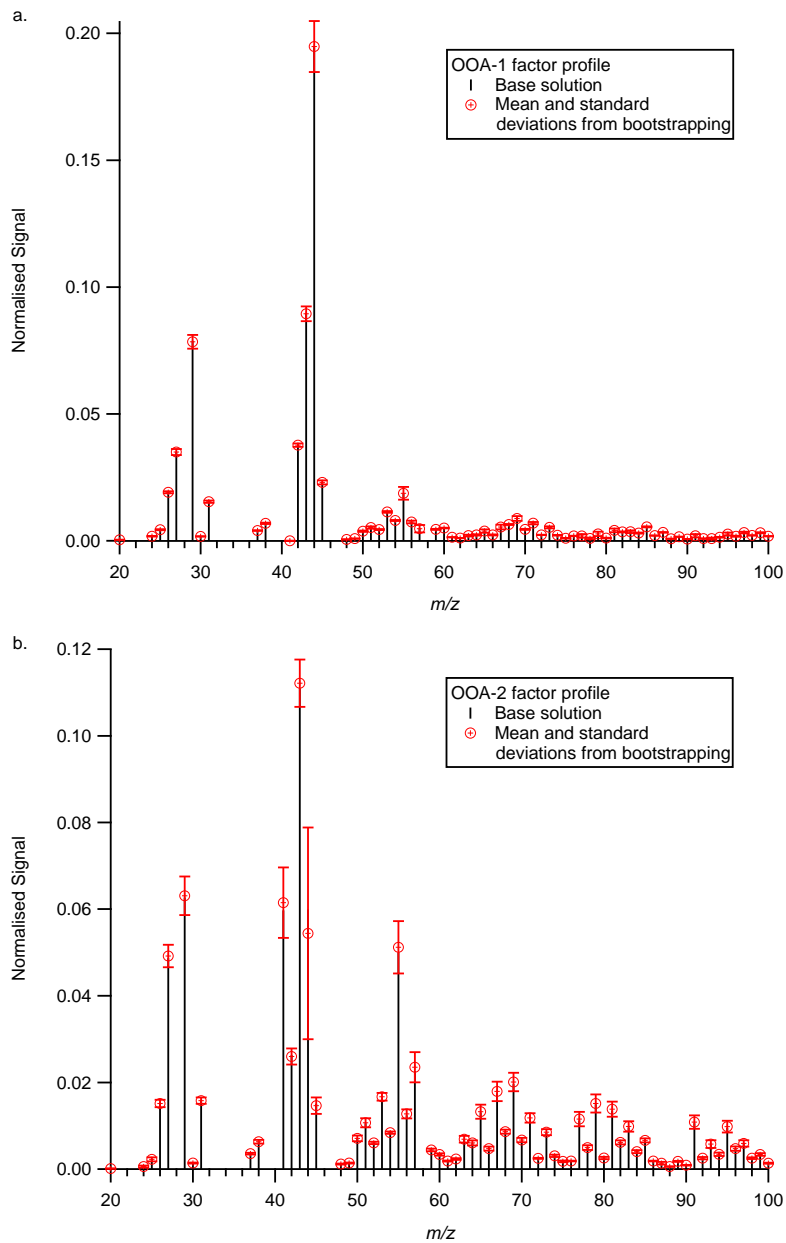

Figure S14: Results of the bootstrapping analysis for the two factor solution mass spectra for flight B362. (a) displays the mass spectrum for OOA-1, while (b) displays the mass spectrum for OOA-2.



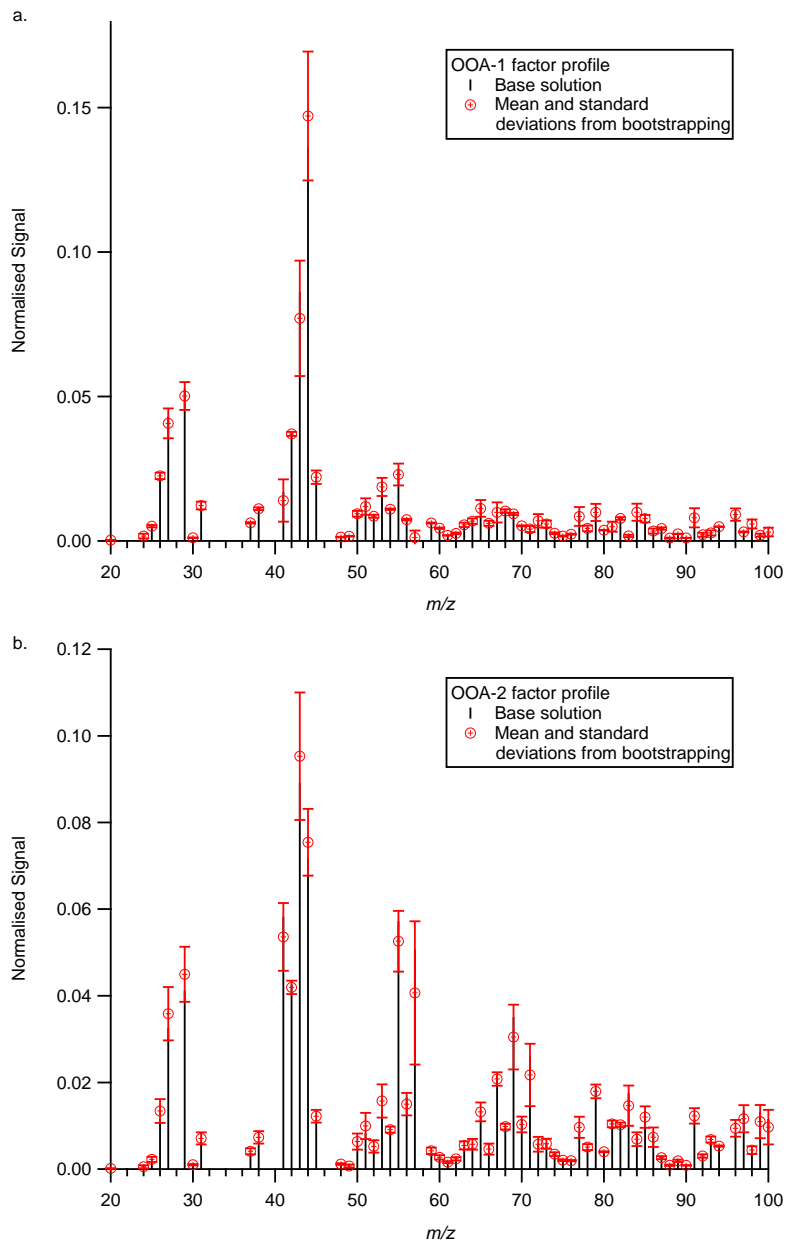

Figure S15: Results of the bootstrapping analysis for the two factor solution mass spectra for flight B369. (a) displays the mass spectrum for OOA-1, while (b) displays the mass spectrum for OOA-2.

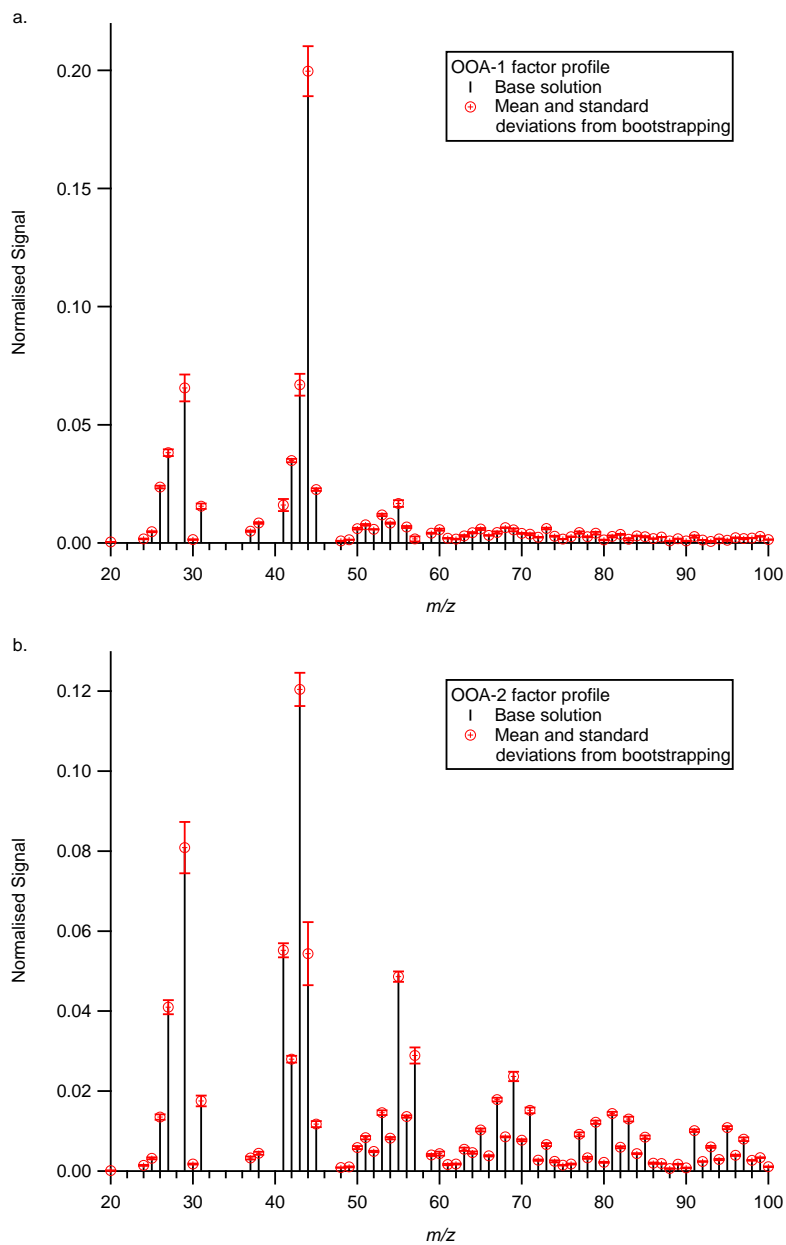

Figure S16: Results of the bootstrapping analysis for the two factor solution mass spectra for flight B406. (a) displays the mass spectrum for OOA-1, while (b) displays the mass spectrum for OOA-2.
